# Supplementary material for: Polymer fibers with hierarchically porous structure: combination of high temperature electrospinning and thermally induced phase separation
Source: Royal Society of Chemistry journal article supplement (doi:10.1039/c3ra41315b), 2013-01-01
Supplement: c3ra41315b.pdf [file c3ra41315b.pdf]

## Supporting Information

### **Polymer Fibers with Hierarchically Porous Structure: Combination of High Temperature Electrospinning and Thermally Induced Phase Separation**

Xiang-Yu Ye<sup>a</sup>, Fu-Wen Lin<sup>b</sup>, Xiao-Jun Huang<sup>a</sup>, Hong-Qing Liang<sup>a</sup> and Zhi-Kang Xu<sup>\*a</sup>

<sup>a</sup>MOE Key Laboratory of Macromolecular Synthesis and Functionalization, Department of Polymer Science and Engineering, Zhejiang University, Hangzhou, 310027, China

<sup>b</sup>Department of Chemistry, Zhejiang University, Hangzhou, 310027, China

\* Corresponding author. E-mail: [xuzk@zju.edu.cn](mailto:xuzk@zju.edu.cn); fax: + 86 571 8795 1773.

**Table S1** Solubility parameters of iPP, DBP and DOP

| Substance | $\delta_d$ | $\delta_p$ | $\delta_h$ | $\delta$ |
|-----------|------------|------------|------------|----------|
| iPP       | 17.19      | -          | -          | 17.19    |
| DBP       | 17.8       | 8.6        | 4.1        | 20.3     |
| DOP       | 16.6       | 7          | 3.1        | 18.2     |

**Table S2** Physical properties of iPP, DBP and DOP

| Properties                                      | iPP   | DBP                            | DOP   |
|-------------------------------------------------|-------|--------------------------------|-------|
| Density $\rho$ (g/cm <sup>3</sup> )             | 0.90  | 1.045                          | 0.986 |
| Evaporation enthalpy $\Delta H_v$ (J/g)         | ----  | 284.7                          | 254.2 |
| Crystallization enthalpy $\Delta H_{cry}$ (J/g) | 209.2 | ----                           | ----  |
| Heat capacity $C_p$ (J/g k)                     | 1.90  | 1.79                           | 1.80  |
| Thermal conductivity $\lambda$ (W/m k)          | 0.22  | 0.10~0.30 for organic solvents |       |

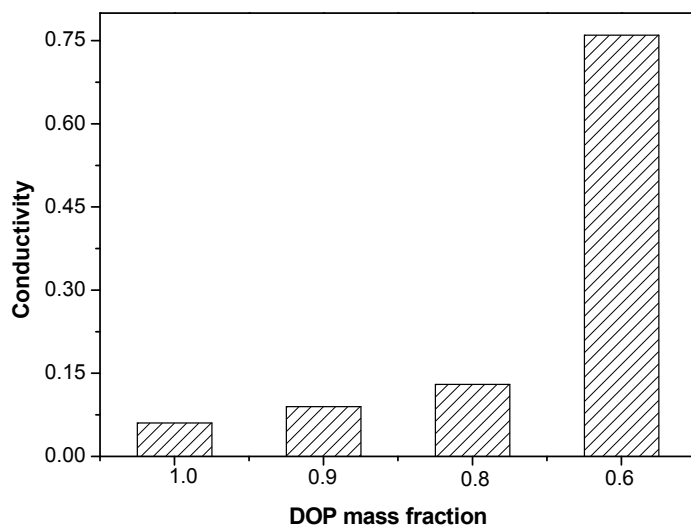

**Fig. S1** Effect of 1.0% (w/w) ionic liquid addition on the solution conductivity.

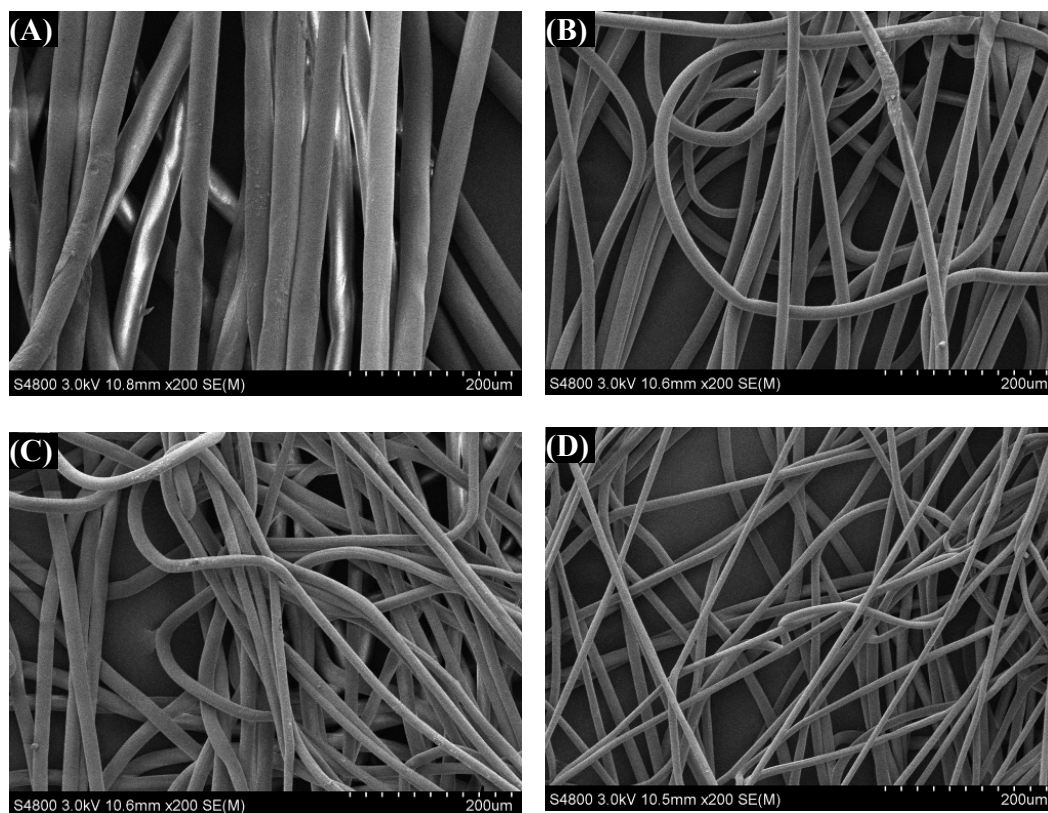

**Fig. S2** SEM pictures of iPP fibers electrospun from iPP/DOP solutions with different [CMim][NTf<sub>2</sub>] contents: (A) 0; (B) 0.67; (C) 1.33; (D) 2.00 % (w/w).

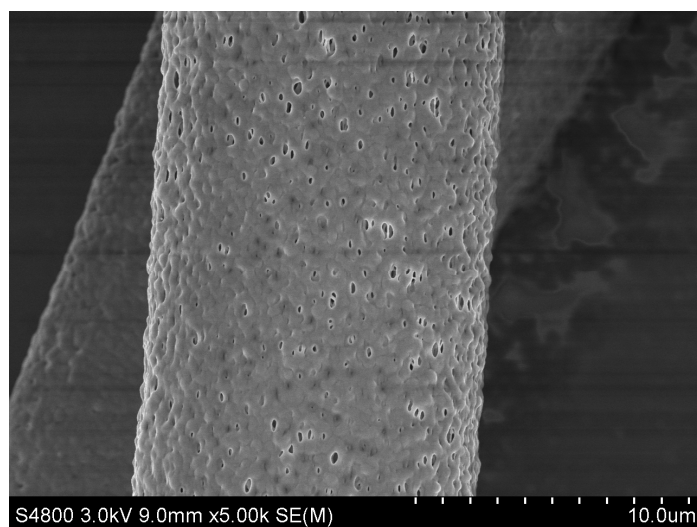

**Fig. S3** Surface morphology of fiber electrospun from iPP/DOP with 1.33% ionic liquid after introduction of an additional MSCS process. The extension ratio was 200%.

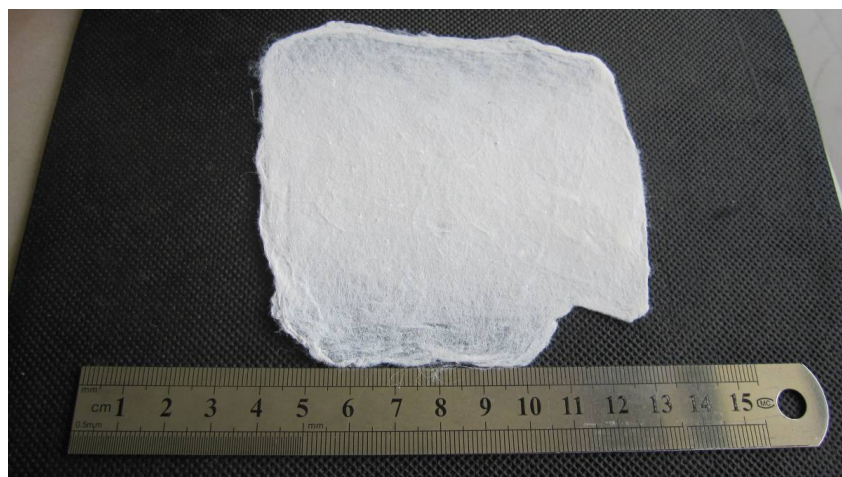

**Fig. S4** Photograph of as-spun large iPP porous nonwoven mesh.
